# Supplementary material for: Impact of Updated NCCN Guidelines on Clinical Management and Risk Communication for CHEK2 p.I157T Carriers in Breast Cancer
Source: Research Square preprint supplement (doi:10.21203/rs.3.rs-8833709/v1), 2026-02-22
Supplement: Supplementary file 1 [file d0a196c0f04bec2b1585e7f0.docx]

**SUPPLEMENTAL DATA**

**Table S1** Provider-reported understanding of cancer risk for clinically significant *CHEK2* variants

| Cancer type | *N=*1511 |
| --- | --- |
| Breast | 151 (100%) |
| Colorectal | 44 (29%) |
| Endometrial | 2 (1.3%) |
| Ovarian | 3 (2.0%) |
| Pancreatic | 4 (2.6%) |
| Prostate | 81 (54%) |
| Renal | 23 (15%) |
| Gastric | 2 (1.3%) |
| Thyroid | 39 (26%) |
| Hematologic malignancy | 3 (2.0%) |
| Male breast | 2 (1.3%) |
| Limited or emerging evidence for certain cancer types (e.g., prostate, thyroid, renal) | 16 (11%) |

1n (%)

**Table S2** Logistics of de-escalation communication to patients

| Characteristic |  |
| --- | --- |
| Previous communication of de-escalation |  |
| Yes, I have personally communicated this change in recommendations | 86 (57%) |
| No, I have never personally communicated this change nor has another provider to my knowledge | 45 (30%) |
| Yes, another provider in my practice has communicated this | 20 (13%) |
| Approximate number of patients personally communicated de-escalation to |  |
| 1 | 12 (14%) |
| 2-5 | 42 (49%) |
| 6-10 | 19 (22%) |
| 11-20 | 8 (9.3%) |
| 21-35 | 1 (1.2%) |
| 36-50 | 2 (2.3%) |
| More than 50 | 2 (2.3%) |
| Mode of contact |  |
| Letter | 9 (8.5%) |
| At an appointment/verbally | 33 (31%) |
| Phone call | 5 (4.7%) |
| More than one of the listed options | 14 (13%) |
| Do not recontact patients to share de-escalation unless patient initiates | 41 (39%) |
| Who in practice most often discloses change in management to patient |  |
| Medical oncologist | 9 (8.5%) |
| Geneticist | 1 (0.9%) |
| Genetic counselor | 73 (69%) |
| Registered nurse | 0 (0%) |
| Nurse specialist | 7 (6.6%) |
| Physician assistant/associate | 3 (2.8%) |
| Medical assistant | 1 (0.9%) |
| Nurse Practitioner | 8 (7.5%) |
| Breast Surgeon | 1 (0.9%) |
| Primary care physician | 1 (0.9%) |
| Whoever is seeing the patient, depends on who is available and willing | 1 (0.9%) |
| How change is communicated |  |
| Practice does not share the change in recommendations with patients | 22 (21%) |
| This change is shared with all *CHEK2* p.I157T carriers and is communicated as a new result | 6 (5.7%) |
| This change is shared with all *CHEK2* p.I157T carriers and is communicated as a de-escalation or modification of a previous result | 41 (39%) |
| This change is only shared with patients if it changes their breast cancer screening management and it is communicated as a new result | 8 (7.5%) |
| This change is only shared with patients if it changes their breast cancer screening management and it is communicated as a de-escalation or modification of a previous result | 29 (27%) |

N (%)

**Table S3** Confidence level in communicating NCCN guideline changes

| Question/Statement | *N=*1511 |
| --- | --- |
| There is enough information in NCCN Guidelines for me to feel comfortable communicating this change in recommended management to patients. |  |
| Strongly agree | 40 (26%) |
| Agree | 85 (56%) |
| Disagree | 26 (17%) |
| Strongly disagree | 0 (0%) |
| (1=Strongly Agree, ..., 4=Strongly Disagree), Mean (SD) | 1.91 (0.66) |
| How confident do you feel communicating the change in NCCN recommendations for breast cancer management for patients with a *CHEK2* p.I157T variant? |  |
| Extremely confident | 51 (34%) |
| Fairly confident | 76 (50%) |
| Not very confident | 22 (15%) |
| Not confident at all | 2 (1.3%) |
| (1=Extremely confident, ..., 4=Not confident at all), Mean (SD) | 1.83 (0.72) |

1n (%)
